# Supplementary material for: Verification of Arabidopsis stock collections using SNPmatch, a tool for genotyping high-plexed samples
Source: PubMed Central journal article supplement (PMC5744633; doi:10.1038/sdata.2017.184), 2017-12-19
Supplement: sdata2017184-s1.pdf [file sdata2017184-s1.pdf]

## Supplementary material

### Verification of *Arabidopsis* stock collections using SNPmatch, an algorithm for genotyping high-plexed samples

Rahul Pisupati, Ilka Reichardt, Ümit Seren, Pamela Korte, Viktoria Nizhynska, Envel Kerdaffrec, Kristina Uzunova, Fernando Rabanal, Daniele Filiault and Magnus Nordborg\*

|                                |          |
|--------------------------------|----------|
| <b>Supplementary Figure S1</b> | <b>1</b> |
| <b>Supplementary Figure S2</b> | <b>2</b> |
| <b>Supplementary Figure S3</b> | <b>2</b> |
| <b>Supplementary Table S1</b>  | <b>2</b> |
| <b>Supplementary Table S2</b>  | <b>3</b> |
| <b>Supplementary Table S3</b>  | <b>3</b> |

#### Supplementary Figure S1

Pairwise comparisons. Histogram of pairwise single nucleotide differences between strains in the “1001 Genomes” panel. The panel above is zoomed in for x-axis range from zero to eight thousand pairwise differences.

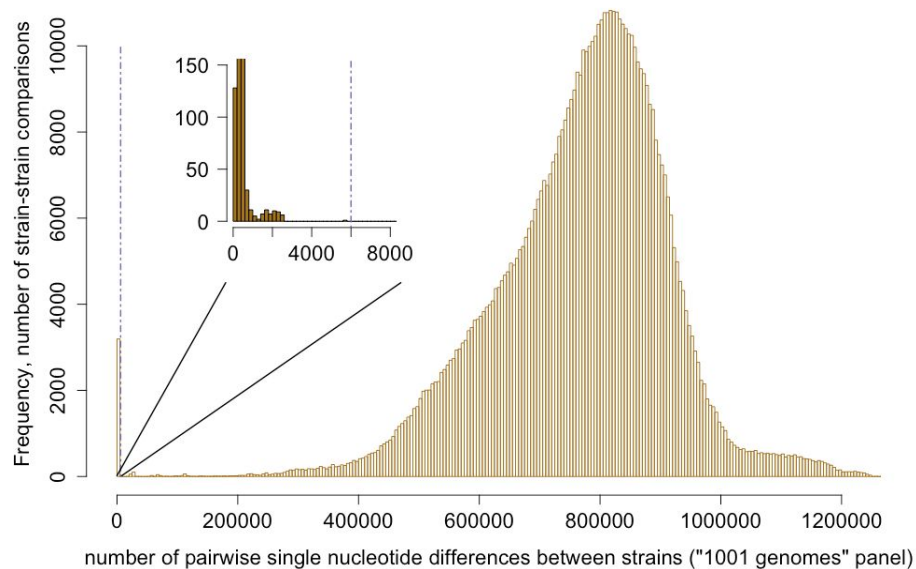

### Supplementary Figure S2

The fraction of heterozygous SNPs in samples that do not unambiguously match to any strain (red) are comparable to other samples. F2 individuals (orange) have a much higher fraction of heterozygous calls when their coverage is good.

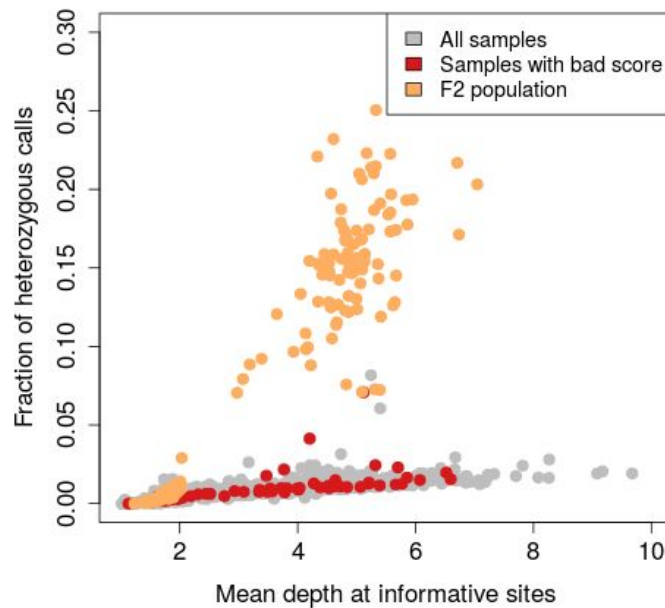

### Supplementary Figure S3

Number of samples ambiguously identified by SNPmatch given random subsets of SNPs from the *Medicago truncatula* “HapMap” project (Mt 4.0 based). SNPmatch readily identified correct genotypes with only a few thousand random SNP markers.

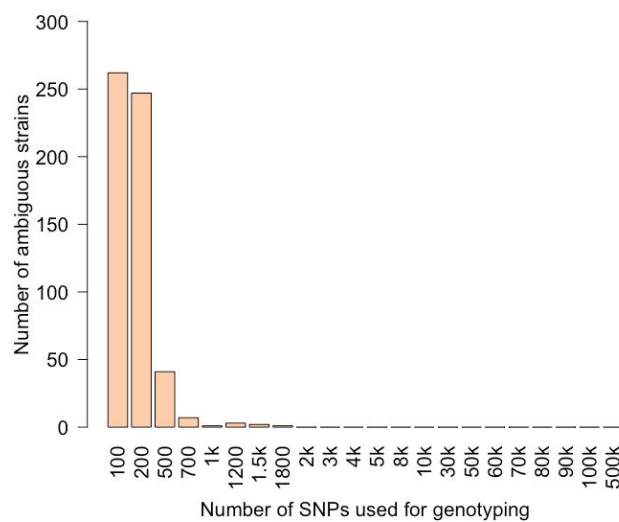

### Supplementary Table S1

Genotyping results using SNPmatch after subsetting specific number of reads from published "1001 Genomes" raw data.

| Number of reads | Total strains analysed | Unambiguously identified | % ambiguous |
|-----------------|------------------------|--------------------------|-------------|
| 1 million       | 1110                   | 914                      | 17.66       |
| 3 million       | 1118                   | 918                      | 17.89       |
| 6 million       | 1117                   | 912                      | 18.35       |

### Supplementary Table S2

SNPmatch results for the two replicates resequenced with different library preparation protocols.

| Round | Library preparation protocol | Multiplexing per Illumina lane | Mean depth | % unambiguous samples | Mean probability of match for unambiguous hits |
|-------|------------------------------|--------------------------------|------------|-----------------------|------------------------------------------------|
| 1     | Nextera kit Tn5 tagmentation | 96                             | 4.67       | 79%                   | 0.993                                          |
| 2     | Lucigen Tn5 tagmentation     | 192                            | 1.9        | 80.40%                | 0.997                                          |

### Supplementary Table S3

List of strains in "1001 genomes" panel which needed attention. We identified the correct origin for some of the strains (colored in orange) and the correct seeds will be replaced. The origin of for strains colored in red are still unknown.

| incorrectly assigned strains |      |              |        |         |
|------------------------------|------|--------------|--------|---------|
| Ecotype ID                   | name | stock center |        | top hit |
|                              |      | ID           | origin |         |
| 8387                         | St-0 | CS77270      | SWE    | 8386    |
| 7250                         | Me-0 | CS76549      | GER    | 7394    |

|      |            |         |     |           |
|------|------------|---------|-----|-----------|
| 9314 | Gol-2      | CS76883 | UK  | 9937      |
| 9437 | Puk-2      | CS77195 | SWE | 9436      |
| 9503 | 11C1       | CS76640 | UK  | 9910      |
| 9622 | Bijisk-4   | CS76707 | RUS | 9737      |
| 9632 | Lebja-2    | CS77016 | RUS | 9642      |
| 9642 | Rakit-3    | CS77204 | RUS | 9632      |
| 9658 | Nicas-1    | CS77127 | ITA | 9655      |
| 7125 | Er-0       | CS78898 | GER | 9761      |
| 9761 | Bik-1      | CS76449 | LBN | 9764      |
| 9790 | Gn2-3      | CS76881 | GER | 9777      |
| 9908 | ESP-1-11   | CS76847 | FRA | 9314      |
| 9910 | BRI-2      | CS76725 | FRA | 9503      |
| 7307 | Pn-0       | CS77182 | FRA | 7316      |
| 9912 | CIRY-13    | CS76773 | FRA | 6909      |
| 7418 | Zu-1       | CS78881 | SUI | 6744      |
| 9927 | ARR-17     | CS76673 | FRA | 9935      |
| 9928 | BEZ-9      | CS76703 | FRA | 9908      |
| 7566 | 627ME-13Y1 | CS78367 | USA | 2159      |
| 9935 | BAU-15     | CS76694 | FRA | 9927      |
| 6680 | ANH-1      | CS76437 | GER | 6990      |
| 7063 | Can-0      | CS76740 | ESP | 7186      |
| 9312 | Ullapool-8 | CS78821 | UK  | 9912      |
| 7138 | Fi-0       | CS76488 | GER | 7125      |
| 9739 | Toc-1      | CS77370 | ROU | 9738      |
| 9911 | ARGE-1-15  | CS76672 | FRA | 9928      |
| 9914 | IST-29     | CS76948 | FRA | 9312/9917 |
| 9929 | ISS-20     | CS76947 | FRA | 9925      |
| 1819 | Lak-12     | CS78974 | USA | 6909      |

| strains that don't match anything |      |              |        |
|-----------------------------------|------|--------------|--------|
| Ecotype ID                        | name | stock center | origin |

| ID   |                |         |     |
|------|----------------|---------|-----|
| 9624 | Chaba-2        | CS76767 | RUS |
| 9646 | Aiell-1        | CS76648 | ITA |
| 9655 | Marce-1        | CS77071 | ITA |
| 9657 | Melic-1        | CS77078 | ITA |
| 9659 | Pigna-1        | CS77177 | ITA |
| 7417 | Zu-0           | CS78880 | SUI |
|      | Castelfed-3-20 |         |     |
| 9691 | 7              | CS76756 | ITA |
| 9697 | Dolen-1        | CS76802 | BUL |
| 9707 | Podvi-1        | CS77187 | BUL |
| 9709 | Zerev-1-34     | CS78878 | BUL |
| 9714 | Grivo-1        | CS76888 | BUL |
| 9716 | Leska-1-44     | CS77030 | BUL |
| 9723 | Slavi-2        | CS77252 | BUL |
| 6990 | Amel-1         | CS76434 | NED |
| 9729 | Stiav-2        | CS77280 | SVK |
| 9735 | Bela-4         | CS76699 | SVK |
| 9737 | Ulies-1        | CS78815 | ROU |
| 9741 | Orast-1        | CS77151 | ROU |
| 9747 | Zabar-1        | CS78870 | SRB |
| 7218 | Le-0           | CS76540 | NED |
| 7280 | Old-1          | CS76567 | GER |
| 9917 | RAD-21         | CS77200 | FRA |
| 7332 | Seattle-0      | CS76598 | USA |
| 8354 | Per-1          | CS76571 | RUS |
| 8420 | Kelsterbach-4  | CS76525 | GER |
| 9610 | Lesno-4        | CS77034 | RUS |
| 9615 | Parti-1        | CS77163 | RUS |
| 9937 | CATS-6         | CS76760 | FRA |
| 6198 | TDr-13         | CS77347 | SWE |
| 7427 | Ko-2           | CS76531 | DEN |
| 7164 | Hau-0          | CS76915 | DEN |

|      |           |         |     |
|------|-----------|---------|-----|
| 9592 | IP-Vae-2  | CS78827 | ESP |
| 9608 | Karag-2   | CS76961 | RUS |
| 9661 | Cimin-1   | CS76771 | ITA |
| 7377 | Tul-0     | CS76618 | USA |
| 7415 | Wu-0      | CS78858 | GER |
| 9909 | GEN-8     | CS76877 | FRA |
| 9915 | Mar-4-16  | CS77069 | FRA |
| 9727 | Olympia-2 | CS77144 | GRC |
| 9920 | DIR-9     | CS76796 | FRA |
| 9921 | FOR-23    | CS76867 | FRA |
| 9924 | PLY-20    | CS77181 | FRA |
| 9930 | LEC-25    | CS77018 | FRA |
| 9932 | NOZ-6     | CS77134 | FRA |
